# Supplementary material for: Enhanced Recovery of Natural Antioxidants from Grape Waste Using Natural Eutectic Solvents-Based Microwave-Assisted Extraction
Source: MDPI journal article supplement (doi:10.3390/molecules28031153), 2023-01-24
Supplement: s1 [file s1]

## **SUPPLEMENTARY MATERIAL**

### **Enhanced Recovery of Natural Antioxidants from Grape Waste Using Natural Eutectic Solvents-Based Microwave-Assisted Extraction**

**Raquel Cañadas, Blanca Sáenz de Miera, Paloma Méndez, Emilio J. González  
and María González-Miquel \***

Department of Chemical and Environmental Engineering, Higher Technical School  
of Industrial Engineering, Universidad Politécnica de Madrid. C/José Gutiérrez  
Abascal 2, 28006 Madrid, Spain

\* Correspondence: maria.gonzalezmiquel@upm.es

Supplementary data includes: 3 Tables

**Table S1.** Total phenolic content (TPC, mg GAE/g WGW) and total flavonoid content (TFC, mg Q/g WGW) extracted by the solvents evaluated from a white grape waste sample (WGW) and antioxidant activity (% DPPH inhibition) of the solvent extracts. Results are expressed as mean values  $\pm$  relative standard deviation (RSD, %). OSE conditions: 100 min at 900 rpm, 60 °C and 1:10 F:S ratio.

| SOLVENTS         | TPC (mg GAE/g WGW) $\pm$ RSD (%) | TFC (mg Q/g WGW) $\pm$ RSD (%) | Antioxidant activity (% DPPH inhibition) $\pm$ RSD (%) |
|------------------|----------------------------------|--------------------------------|--------------------------------------------------------|
| H <sub>2</sub> O | 7.89 $\pm$ 0.19                  | 35.62 $\pm$ 1.78               | 80.65 $\pm$ 2.03                                       |
| Et30DW           | 19.92 $\pm$ 0.96                 | 49.40 $\pm$ 2.27               | 83.81 $\pm$ 2.19                                       |
| ChCl: 2But [1:3] | 8.643 $\pm$ 0.14                 | 78.81 $\pm$ 2.94               | 68.28 $\pm$ 2.41                                       |
| Pro: 2But [1:3]  | 29.26 $\pm$ 1.46                 | 69.39 $\pm$ 2.47               | 57.38 $\pm$ 1.87                                       |
| Bet: 2But [1:3]  | 36.02 $\pm$ 1.10                 | 78.07 $\pm$ 3.90               | 62.00 $\pm$ 2.10                                       |
| ChCl: 2But [1:4] | 26.06 $\pm$ 1.20                 | 84.27 $\pm$ 2.21               | 65.85 $\pm$ 2.29                                       |
| Pro: 2But [1:4]  | 29.31 $\pm$ 1.47                 | 73.04 $\pm$ 3.65               | 53.58 $\pm$ 1.68                                       |
| Bet: 2But [1:4]  | 34.36 $\pm$ 1.72                 | 86.46 $\pm$ 2.32               | 71.71 $\pm$ 3.58                                       |
| ChCl: Gly [1:4]  | 5.94 $\pm$ 0.29                  | 69.51 $\pm$ 2.48               | 75.09 $\pm$ 2.75                                       |
| Pro: Gly [1:4]   | 30.78 $\pm$ 1.54                 | 36.65 $\pm$ 0.83               | 40.30 $\pm$ 1.01                                       |
| Bet: Gly [1:4]   | 35.32 $\pm$ 1.77                 | 51.97 $\pm$ 1.60               | 65.62 $\pm$ 2.28                                       |
| ChCl: Prop [1:4] | 10.76 $\pm$ 3.54                 | 99.50 $\pm$ 0.12               | 61.26 $\pm$ 1.06                                       |
| Pro: Prop [1:4]  | 35.99 $\pm$ 1.79                 | 57.17 $\pm$ 1.86               | 19.26 $\pm$ 0.96                                       |
| Bet: Prop [1:4]  | 43.73 $\pm$ 2.19                 | 107.88 $\pm$ 0.15              | 48.33 $\pm$ 1.42                                       |
| ChCl: 3But [1:4] | 35.25 $\pm$ 1.76                 | 78.13 $\pm$ 1.91               | 52.92 $\pm$ 1.64                                       |

**Table S2.** Mass of each phenolic compounds quantified by HPLC after the conventional extraction process with each solvent evaluated. Results are expressed as mean values (mg phenolic compounds/g WGW)  $\pm$  RSD (%). Phenolic compounds: gallic acid (GA), protocatechuic acid (PA), *p*-hydroxybenzoic acid (HA), caffeic acid (CA), *p*-coumaric acid (*p*CA), ferulic acid (FA), cinnamic acid (CiA) and quercetin (Q). OSE conditions: 100 min at 900 rpm, 60 °C and 1:10 F:S ratio.

| SOLVENTS            | Mass (mg) of phenolic compound recovered / g WGW $\pm$ RSD (%) |                           |                           |                           |                           |                           |                        |                           |
|---------------------|----------------------------------------------------------------|---------------------------|---------------------------|---------------------------|---------------------------|---------------------------|------------------------|---------------------------|
|                     | GA                                                             | PA                        | HA                        | CA                        | <i>p</i> CA               | FA                        | CiA                    | Q                         |
| H <sub>2</sub> O    | 0.0522<br>$\pm$<br>0.0026                                      | 0.0019<br>$\pm$<br>0.0001 | 0.0135<br>$\pm$<br>0.0007 | 0.0037<br>$\pm$<br>0.0002 | 0.0029<br>$\pm$<br>0.0001 | 0.0016 $\pm$<br>0.0001    | 0.0090 $\pm$<br>0.0005 | 0.0351<br>$\pm$<br>0.0018 |
| Et30DW              | 0.0377<br>$\pm$<br>0.0019                                      | 0.0011<br>$\pm$<br>0.0001 | 0.0228<br>$\pm$<br>0.0010 | 0.0034<br>$\pm$<br>0.0002 | 0.0035<br>$\pm$<br>0.0002 | 0.0010 $\pm$<br>0.0000    | 0.0061 $\pm$<br>0.0003 | 0.0353<br>$\pm$<br>0.0018 |
| ChCl: 2But<br>[1:3] | 0.0275<br>$\pm$<br>0.0014                                      | 0.0004<br>$\pm$<br>0.0000 | 0.0183<br>$\pm$<br>0.0007 | 0.0049<br>$\pm$<br>0.0002 | 0.0046<br>$\pm$<br>0.0002 | 0.0036 $\pm$<br>0.0002    | 0.0161 $\pm$<br>0.0008 | 0.0397<br>$\pm$<br>0.0020 |
| Pro: 2But<br>[1:3]  | 0.0246<br>$\pm$<br>0.0012                                      | 0.0194<br>$\pm$<br>0.0001 | 0.0140<br>$\pm$<br>0.0012 | 0.0045<br>$\pm$<br>0.0002 | 0.0039<br>$\pm$<br>0.0002 | 0.0026 $\pm$<br>0.0001    | 0.0175 $\pm$<br>0.0009 | 0.0356<br>$\pm$<br>0.0018 |
| Bet: 2But<br>[1:3]  | 0.0230<br>$\pm$<br>0.0012                                      | 0.0002<br>$\pm$<br>0.0000 | 0.0241<br>$\pm$<br>0.0002 | 0.0042<br>$\pm$<br>0.0002 | 0.0039<br>$\pm$<br>0.0002 | 0.0044 $\pm$<br>0.0002    | 0.0182 $\pm$<br>0.0009 | 0.0352<br>$\pm$<br>0.0018 |
| ChCl: 2But<br>[1:4] | 0.0273<br>$\pm$<br>0.0014                                      | 0.0004<br>$\pm$<br>0.0000 | 0.0157<br>$\pm$<br>0.0008 | 0.0048<br>$\pm$<br>0.0002 | 0.0073<br>$\pm$<br>0.0002 | 0.0034<br>$\pm$<br>0.0002 | 0.0321 $\pm$<br>0.0016 | 0.0365<br>$\pm$<br>0.0018 |
| Pro: 2But<br>[1:4]  | 0.0234<br>$\pm$<br>0.0012                                      | 0.0003<br>$\pm$<br>0.0000 | 0.0130<br>$\pm$<br>0.0006 | 0.0048<br>$\pm$<br>0.0002 | 0.0077<br>$\pm$<br>0.0004 | 0.0026 $\pm$<br>0.0001    | 0.0325 $\pm$<br>0.0016 | 0.0352<br>$\pm$<br>0.0018 |
| Bet: 2But<br>[1:4]  | 0.0298<br>$\pm$<br>0.0015                                      | 0.0004<br>$\pm$<br>0.0000 | 0.0184<br>$\pm$<br>0.0009 | 0.0039<br>$\pm$<br>0.0002 | 0.0064<br>$\pm$<br>0.0004 | 0.0022 $\pm$<br>0.0001    | 0.0310 $\pm$<br>0.0003 | 0.0348<br>$\pm$<br>0.0017 |
| ChCl: Gly<br>[1:4]  | 0.0246<br>$\pm$<br>0.0012                                      | 0.0007<br>$\pm$<br>0.0000 | 0.0184<br>$\pm$<br>0.0009 | 0.0033<br>$\pm$<br>0.0002 | 0.0031<br>$\pm$<br>0.0003 | 0.0012 $\pm$<br>0.0001    | 0.0060 $\pm$<br>0.0006 | 0.0329<br>$\pm$<br>0.0016 |
| Pro: Gly<br>[1:4]   | 0.0189<br>$\pm$<br>0.0009                                      | 0.0033<br>$\pm$<br>0.0002 | 0.0112<br>$\pm$<br>0.0006 | 0.0034<br>$\pm$<br>0.0002 | 0.0036<br>$\pm$<br>0.0002 | 0.0023 $\pm$<br>0.0001    | 0.0115 $\pm$<br>0.0006 | 0.0356<br>$\pm$<br>0.0018 |
| Bet: Gly<br>[1:4]   | 0.0310<br>$\pm$<br>0.0016                                      | 0.0020<br>$\pm$<br>0.0001 | 0.0128<br>$\pm$<br>0.0006 | 0.0035<br>$\pm$<br>0.0002 | 0.0039<br>$\pm$<br>0.0002 | 0.0025 $\pm$<br>0.0001    | 0.0124 $\pm$<br>0.0008 | 0.0385<br>$\pm$<br>0.0019 |
| ChCl: Prop<br>[1:4] | 0.0293<br>$\pm$<br>0.0015                                      | 0.0016<br>$\pm$<br>0.0001 | 0.0172<br>$\pm$<br>0.0009 | 0.0059<br>$\pm$<br>0.0003 | 0.0074<br>$\pm$<br>0.0002 | 0.0041 $\pm$<br>0.0002    | 0.0164 $\pm$<br>0.0005 | 0.0421<br>$\pm$<br>0.0021 |

|                             |                       |                       |                       |                       |                       |                    |                    |                       |
|-----------------------------|-----------------------|-----------------------|-----------------------|-----------------------|-----------------------|--------------------|--------------------|-----------------------|
| <b>Pro: Prop<br/>[1:4]</b>  | 0.0165<br>±<br>0.0008 | 0.0016<br>±<br>0.0001 | 0.0107<br>±<br>0.0005 | 0.0060<br>±<br>0.0003 | 0.0073<br>±<br>0.0004 | 0.0017 ±<br>0.0001 | 0.0103 ±<br>0.0001 | 0.0375<br>±<br>0.0019 |
| <b>Bet: Prop<br/>[1:4]</b>  | 0.0255<br>±<br>0.0013 | 0.0012<br>±<br>0.0001 | 0.0172<br>±<br>0.0009 | 0.0035<br>±<br>0.0002 | 0.0060<br>±<br>0.0003 | 0.0016 ±<br>0.0001 | 0.0112<br>±0.0006  | 0.0353<br>±<br>0.0018 |
| <b>ChCl: 3But<br/>[1:4]</b> | 0.0260<br>±<br>0.0013 | 0.0005<br>±<br>0.0000 | 0.0060<br>±<br>0.0003 | 0.0033<br>±<br>0.0002 | 0.0019<br>±<br>0.0001 | 0.0234 ±<br>0.0002 | 0.0215 ±<br>0.0011 | 0.0355<br>±<br>0.0018 |

**Table S3.** Phenolic compounds extracted (mg phenolic compounds/g WGW) and antioxidant activity (% DPPH Inhibition) of the extracts according to the orbital shaker extraction (OSE) or micro-wave-assisted extraction (MAE) method used and as a function of the solvent evaluated (ethanol with 30 % (v/v) distilled water (Et30DW) or Bet: 2But [1:4]). Results are expressed as mean values ± RSD.

| <b>SOLVENTS</b>        | <b>EXTRACTION METHOD</b> | <b>TEMPERATURE (°C)</b> | <b>TIME (min)</b> | <b>Mass (mg) of phenolic compounds recovered / g WGW ± RSD (%)</b> | <b>Antioxidant activity (% DPPH inhibition) ± RSD (%)</b> |
|------------------------|--------------------------|-------------------------|-------------------|--------------------------------------------------------------------|-----------------------------------------------------------|
| <b>Et30DW</b>          | OSE                      | 60                      | 100               | 0.111 ± 0.008                                                      | 83.811 ± 1.191                                            |
|                        | MAE                      | 60                      | 3                 | 0.048 ± 0.006                                                      | 92.834 ± 2.642                                            |
|                        |                          |                         | 6                 | 0.063 ± 0.004                                                      | 91.508 ± 1.575                                            |
|                        |                          |                         | 9                 | 0.158 ± 0.008                                                      | 87.303 ± 2.365                                            |
|                        |                          | 100                     | 3                 | 0.018 ± 0.008                                                      | 66.390 ± 3.319                                            |
|                        |                          |                         | 6                 | 0.017 ± 0.008                                                      | 80.604 ± 2.030                                            |
|                        |                          |                         | 9                 | 0.021 ± 0.002                                                      | 73.834 ± 3.692                                            |
| <b>Bet: 2But [1:4]</b> | OSE                      | 60                      | 100               | 0.127 ± 0.005                                                      | 71.710 ± 2.585                                            |
|                        | MAE                      | 60                      | 3                 | 0.023 ± 0.002                                                      | 44.180 ± 1.209                                            |
|                        |                          |                         | 6                 | 0.017 ± 0.001                                                      | 56.828 ± 2.841                                            |

|  |  |     |   |                   |                    |
|--|--|-----|---|-------------------|--------------------|
|  |  |     | 9 | $0.021 \pm 0.002$ | $25.505 \pm 1.275$ |
|  |  | 100 | 3 | $0.147 \pm 0.007$ | $91.279 \pm 2.564$ |
|  |  |     | 6 | $0.066 \pm 0.002$ | $90.785 \pm 2.539$ |
|  |  |     | 9 | $0.088 \pm 0.004$ | $90.245 \pm 3.512$ |
